# Supplementary material for: A superhydrophilic zwitterionic hydrogel coating for enhancing long-term anti-bacterial adhesion and anti-encrustation properties of ureteral stents
Source: Royal Society of Chemistry journal article supplement (doi:10.1039/d5bm01692d), 2025-12-29
Supplement: d5bm01692d1.pdf [file d5bm01692d1.pdf]

## Supporting Information

**Title:** A Superhydrophilic Zwitterionic Hydrogel Coating for Enhancing Long-Term Anti-bacterial Adhesion and Anti-encrustation Properties of Ureteral Stents

**Authors:** Zhenqing Li<sup>1</sup>, Jiawei Li<sup>1</sup>, Lei Qian<sup>1</sup>, Ye Tian<sup>2</sup>, Haoyu Jin<sup>2</sup>, Peng Yu<sup>1</sup>, Zhengao Wang<sup>3\*</sup>, Chengyun Ning<sup>1\*</sup>, Jinxia Zhai<sup>2\*</sup>

### Authors Affiliations:

1 School of Materials Science and Engineering, South China University of Technology, Guangzhou 510641, China

2 College of Medical Instruments, Guangdong Food and Drug Vocational College, Guangzhou 510520, China

3 Research Center of Biomass 3D Printing Materials, College of Materials and Energy, South China Agricultural University, Guangzhou, 510642, China

\* Corresponding author e-mail: zhengao@scau.edu.cn; imcyning@scut.edu.cn; zhajjinxia@gdyzy.edu.cn.

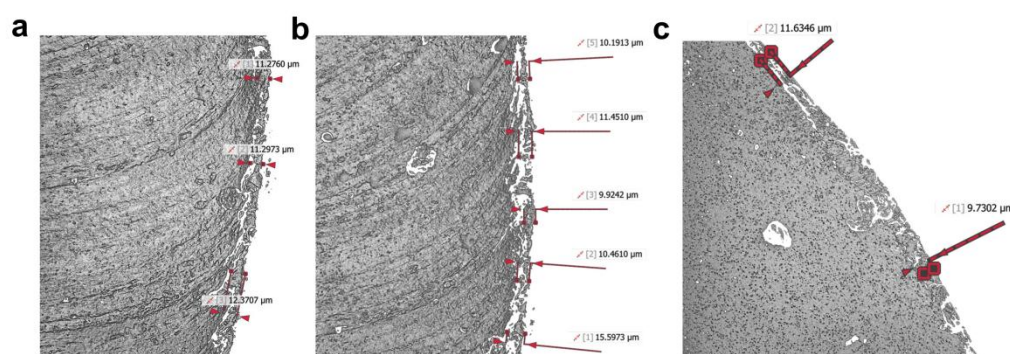

**Fig. s1.** The film thickness of coated samples measured by 3D optical profiler. (a, b, c)

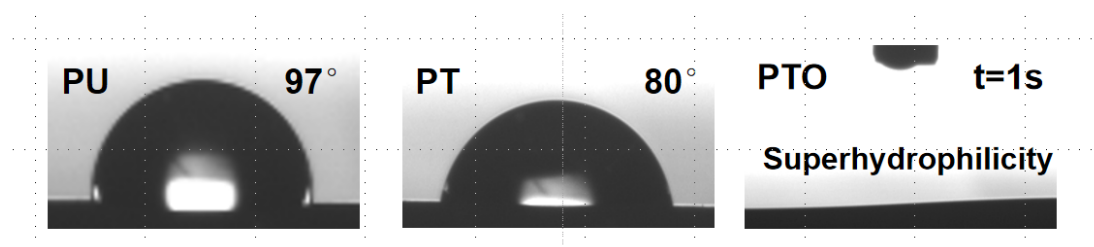

**Fig. s2.** Contact angles on stents after six month storage.

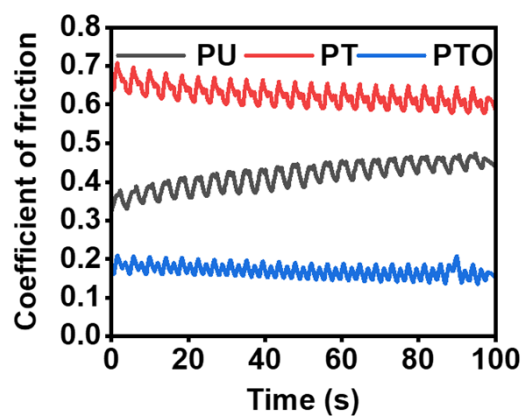

**Fig. s3.** The friction coefficient of stents after six month storage.

**Table s1.** The friction coefficient of stents before and after six month storage

|                 | PU      | PT      | PTO     |
|-----------------|---------|---------|---------|
| Initial         | 0.43699 | 0.56847 | 0.14103 |
| After six month | 0.40378 | 0.63785 | 0.17514 |

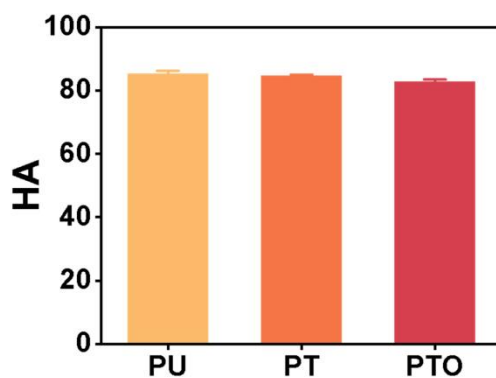

**Fig. s4.** The hardness test of samples (PU, PT, PTO).

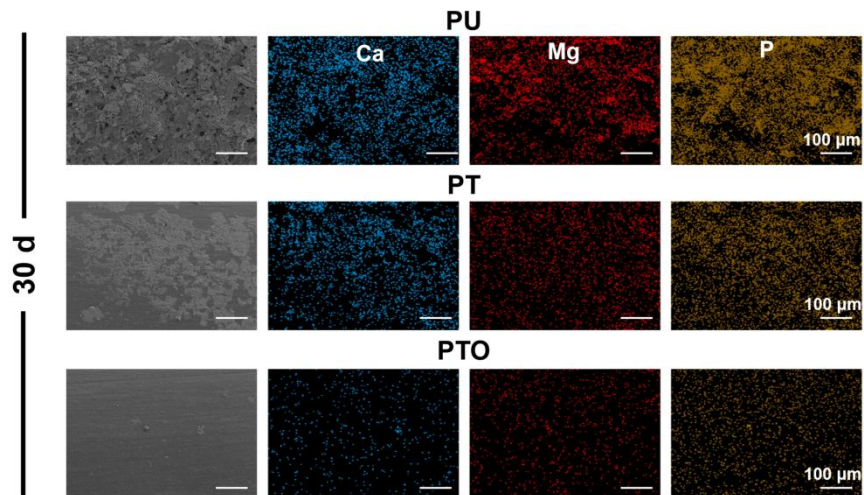

**Fig. s5.** Element aggregation of stents after 30 days.
